# Supplementary material for: Health research priorities for wildland firefighters: a modified Delphi study with stakeholder interviews
Source: PubMed Central journal article supplement — BMJ Open. 2022 Feb 3;12(2):e051227. doi: 10.1136/bmjopen-2021-051227 (PMC8814744; doi:10.1136/bmjopen-2021-051227), 2022-02-03
Supplement: bmjopen-2021-051227supp001.pdf [file bmjopen-2021-051227supp001.pdf]

What is your current age?

With which gender do you most identify?

- Female
- Male
- Gender non-conforming
- Prefer not to answer
- A gender not listed here:

\* Are you a current BCWS employee, or auxiliary employee that worked in the 2019 wildfire season?

- Yes
- No

How would you best classify your current role?

- Researcher or research trainee
- Employed in occupational health and safety management or regulations
- Union (e.g., BCGEU) employee
- Other (please specify)

Out of which fire centre were/are you most recently working?

- Cariboo  
 Coastal  
 Kamloops  
 Northwest  
 Prince George  
 Southeast  
 Other (please specify)

What was your primary role with BCWS this past wildfire season (2019)?

- Wildland firefighter  
 BCWS PWCC/Fire Centre Staff  
 BCWS Zone Staff  
 Aviation (i.e. Pilot, Air Attack Officer, etc.)  
 Other (please specify)

What other roles, if any, have you participated in previous wildfire seasons, including 2019 (or will be doing in 2020) (select all that apply)?

- Wildland firefighter  
  BCWS PWCC/Fire Centre Staff  
  BCWS Zone Staff  
  Aviation (i.e. Pilot, Air Attack Officer, etc.)  
  Incident Command Team member  
  Other (please specify)

 

How many years/seasons have you been an employee of BCWS (not counting 2020)?

How many of these years/seasons worked were spent participating in direct fire suppression on the fireline (for example, as a crew member/leader)?

Please list up to 10 topics relating to health and wellbeing of **wildland firefighters** that you think should be the focus of (or priority for) research topics.

Research Topic

Please list up to 10 topics relating to health and wellbeing of wildland fire **related personnel** ( i.e. members of Incident Command teams, Wildfire Officers/Assistants, PWCC/Fire Centre/Zone staff, dispatchers, etc) that you think should be the focus of (or priority for) research projects.

Research Topic

Please use this space to list more topic areas or make any additional comments.

Thank you for completing Phase 1 of the stakeholder consultation.

Phase 2 will involve ranking the most common answers regarding priority topics for research.

If you would like to participate in Phase 2 please provide your email address below (non-governmental email preferred).

Would you like to be entered into a draw for one of five \$50 Amazon gift cards?

Yes

No

email address

If you would like to contact the research team please email us at: [wildfirestudy@unbc.ca](mailto:wildfirestudy@unbc.ca)
