# Supplementary material for: Health research priorities for wildland firefighters: a modified Delphi study with stakeholder interviews
Source: PubMed Central journal article supplement — BMJ Open. 2022 Feb 3;12(2):e051227. doi: 10.1136/bmjopen-2021-051227 (PMC8814744; doi:10.1136/bmjopen-2021-051227), 2022-02-03
Supplement: bmjopen-2021-051227supp003.pdf [file bmjopen-2021-051227supp003.pdf]

### Semi-structured interview schedule

Thank you for taking the time to meet with us today. You previously completed two surveys where you were asked to list and then rank health research priorities for wildland firefighters (or wildfire fighters). Today, we would like to talk to you about these research priorities, to find out which ones are most relevant to you, most important to you, and to discuss some specific ideas you may have about a program of research. Although the ranking of priorities from the survey will not change based on our discussion, it will add a more nuanced description of the identified research topics. This interview will last approximately 20-30min. Have you reviewed the consent form? Do you have any questions?

Before we start, can you please confirm if you agree to be recorded?

1. What is your primary role as it relates to wildfire and what region of BC (or BCWS fire centre) do you work in (*if relevant*)? How long have you been in this role and have you done any other roles?
2. Can you tell me about your current understanding of research, if you think it is important for BCWS to support in general?
  - a. Are you aware of any research or mitigation strategies in use that you think are particularly helpful or relevant?
3. Thinking about your role (or previous roles), what do you see as the most relevant health concerns or risks?
4. The top research priorities identified in our two round surveys were *1) understanding & mitigating effects of smoke inhalation on respiratory health; 2) fatigue & sleep; 3) mental health; 4) long-term risk & prevalence of disease other than respiratory (e.g., cardiovascular, cancer); 5) stress.*
  - a. Do you agree with this ranking?
  - b. Are there other topics that you think should be included that were not captured in this list?
  - c. Under these broad categories, are there specific projects you would like to see accomplished?
  - d. What research questions do you think we should focus on?
5. Do you perceive any specific barriers or challenges in doing this research?
  - a. Do you anticipate there would be any barriers to implementing any of the mitigation strategies for these health risks?
6. Do you have anything to add specifically to research and health priorities for wildfire fighters?
